# Supplementary material for: A pollution gradient contributes to the taxonomic, functional, and resistome diversity of microbial communities in marine sediments
Source: Microbiome. 2019 Jul 15;7:104. doi: 10.1186/s40168-019-0714-6 (PMC6632204; doi:10.1186/s40168-019-0714-6)
Supplement: Supplementary file 3 — Table S3. Significantly enriched KEGG pathways in Centre Island comparing to Tung Ping Chau. (XLSX 9 kb) [file 40168_2019_714_MOESM3_ESM.xlsx]

## Sheet: Sheet1
KO Pathway	mean of CI	mean of TPC	Statistical Value	P Value	singLogP
Sulfur metabolism	87.6667	49	7.90746	1.30363e-05	4.88484	*
Sulfur relay system	13	9	7.74597	1.56033e-05	4.80678	*
Trinitrotoluene degradation	34.6667	18.6667	4.05674	0.00229856	2.63854	*
Peptidoglycan biosynthesis	7.66667	4.66667	3.80319	0.00346762	2.45997
Benzoate degradation	25	15.6667	3.56753	0.00511672	2.29101	*
Alanine, aspartate and glutamate metabolism	141.667	108.667	3.43386	0.00639695	2.19403
Synthesis and degradation of ketone bodies	10.6667	6.66667	3.3541	0.00731462	2.13581
Histidine metabolism	35.6667	28.3333	3.11127	0.0110368	1.95716
Taurine and hypotaurine metabolism	20	11.6667	2.91408	0.0154564	1.81089
Aminoacyl-tRNA biosynthesis	251	198.667	2.90601	0.0156714	1.80489
Base excision repair	13	10	2.90474	0.0157056	1.80394
Pyruvate metabolism	129.333	109.333	2.75705	0.0202318	1.69397
Phenylalanine metabolism	51.6667	40.6667	2.69804	0.0223886	1.64997
Propanoate metabolism	133.333	106	2.62314	0.02546	1.59414
Starch and sucrose metabolism	61.6667	47	2.47051	0.0330761	1.48049
Arginine and proline metabolism	89.3333	74.3333	2.44334	0.0346502	1.46029
Glycolysis / Gluconeogenesis	139	123	2.43057	0.0354154	1.45081
